# Supplementary material
Source: Springer Nature journal article supplement (https://www.springermedizin.de/resource/supplementary/12939_2013_440_MOESM4_ESM.pdf/9551168)

A) SRC against GDP per capita

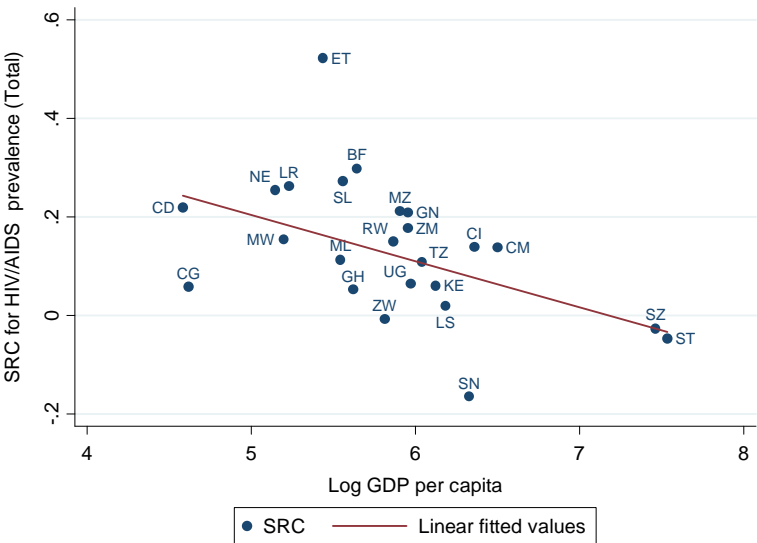

B) SRC against Gini index

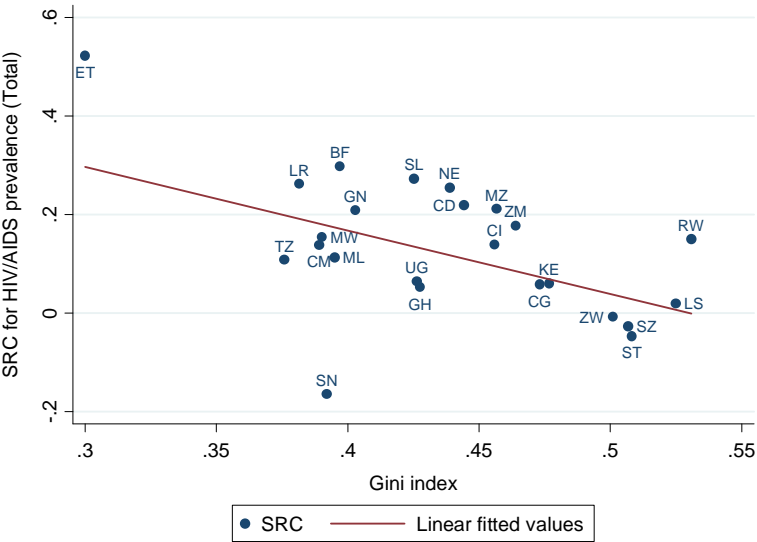

Supplement: MOESM4 [file 9551168]
